# Supplementary material for: A cell-based in vitro assay for testing of immunological integrity of Tetanus toxoid vaccine antigen
Source: PubMed Central journal article supplement (PMC8222253; doi:10.1038/s41541-021-00344-1), 2021-06-23
Supplement: 41541_2021_344_MOESM2_ESM.pdf [file 41541_2021_344_MOESM2_ESM.pdf]

## Reporting Summary

Nature Research wishes to improve the reproducibility of the work that we publish. This form provides structure for consistency and transparency in reporting. For further information on Nature Research policies, see our [Editorial Policies](#) and the [Editorial Policy Checklist](#).

### Statistics

For all statistical analyses, confirm that the following items are present in the figure legend, table legend, main text, or Methods section.

n/a Confirmed

- The exact sample size ( $n$ ) for each experimental group/condition, given as a discrete number and unit of measurement
- A statement on whether measurements were taken from distinct samples or whether the same sample was measured repeatedly
- The statistical test(s) used AND whether they are one- or two-sided  
*Only common tests should be described solely by name; describe more complex techniques in the Methods section.*
- A description of all covariates tested
- A description of any assumptions or corrections, such as tests of normality and adjustment for multiple comparisons
- A full description of the statistical parameters including central tendency (e.g. means) or other basic estimates (e.g. regression coefficient) AND variation (e.g. standard deviation) or associated estimates of uncertainty (e.g. confidence intervals)
- For null hypothesis testing, the test statistic (e.g.  $F$ ,  $t$ ,  $r$ ) with confidence intervals, effect sizes, degrees of freedom and  $P$  value noted  
*Give  $P$  values as exact values whenever suitable.*
- For Bayesian analysis, information on the choice of priors and Markov chain Monte Carlo settings
- For hierarchical and complex designs, identification of the appropriate level for tests and full reporting of outcomes
- Estimates of effect sizes (e.g. Cohen's  $d$ , Pearson's  $r$ ), indicating how they were calculated

*Our web collection on [statistics for biologists](#) contains articles on many of the points above.*

### Software and code

Policy information about [availability of computer code](#)

Data collection Microsoft Office 2016; GraphPad Prism 8.4.2 (GraphPad Software LLC, USA)

Data analysis GraphPad Prism 8.4.2 (GraphPad Software LLC, USA)

For manuscripts utilizing custom algorithms or software that are central to the research but not yet described in published literature, software must be made available to editors and reviewers. We strongly encourage code deposition in a community repository (e.g. GitHub). See the Nature Research [guidelines for submitting code & software](#) for further information.

### Data

Policy information about [availability of data](#)

All manuscripts must include a [data availability statement](#). This statement should provide the following information, where applicable:

- Accession codes, unique identifiers, or web links for publicly available datasets
- A list of figures that have associated raw data
- A description of any restrictions on data availability

Raw data are associated with Figures:1-6 . Data available on request from the authors.

## Field-specific reporting

Please select the one below that is the best fit for your research. If you are not sure, read the appropriate sections before making your selection.

Life sciences  Behavioural & social sciences  Ecological, evolutionary & environmental sciences

For a reference copy of the document with all sections, see [nature.com/documents/nr-reporting-summary-flat.pdf](https://www.nature.com/documents/nr-reporting-summary-flat.pdf)

## Life sciences study design

All studies must disclose on these points even when the disclosure is negative.

|                 |                                                                                                                             |
|-----------------|-----------------------------------------------------------------------------------------------------------------------------|
| Sample size     | Not applicable.                                                                                                             |
| Data exclusions | No data were excluded from the analyses.                                                                                    |
| Replication     | The experimental findings were performed in 2 to 11 independent experiments as stated at each experiment in the manuscript. |
| Randomization   | Not applicable.                                                                                                             |
| Blinding        | Not applicable.                                                                                                             |

## Reporting for specific materials, systems and methods

We require information from authors about some types of materials, experimental systems and methods used in many studies. Here, indicate whether each material, system or method listed is relevant to your study. If you are not sure if a list item applies to your research, read the appropriate section before selecting a response.

### Materials & experimental systems

| n/a                                 | Involvement in the study                                        |
|-------------------------------------|-----------------------------------------------------------------|
| <input type="checkbox"/>            | <input checked="" type="checkbox"/> Antibodies                  |
| <input checked="" type="checkbox"/> | <input type="checkbox"/> Eukaryotic cell lines                  |
| <input checked="" type="checkbox"/> | <input type="checkbox"/> Palaeontology and archaeology          |
| <input checked="" type="checkbox"/> | <input type="checkbox"/> Animals and other organisms            |
| <input type="checkbox"/>            | <input checked="" type="checkbox"/> Human research participants |
| <input checked="" type="checkbox"/> | <input type="checkbox"/> Clinical data                          |
| <input checked="" type="checkbox"/> | <input type="checkbox"/> Dual use research of concern           |

### Methods

| n/a                                 | Involvement in the study                           |
|-------------------------------------|----------------------------------------------------|
| <input checked="" type="checkbox"/> | <input type="checkbox"/> ChIP-seq                  |
| <input type="checkbox"/>            | <input checked="" type="checkbox"/> Flow cytometry |
| <input checked="" type="checkbox"/> | <input type="checkbox"/> MRI-based neuroimaging    |

## Antibodies

|                 |                                                                                                                                                                                                                                                                                                                                                                                                                                                                                                                                                                                                        |
|-----------------|--------------------------------------------------------------------------------------------------------------------------------------------------------------------------------------------------------------------------------------------------------------------------------------------------------------------------------------------------------------------------------------------------------------------------------------------------------------------------------------------------------------------------------------------------------------------------------------------------------|
| Antibodies used | for flow cytometry: anti-human CD19-Pc7 (clone J3-119; Beckman Coulter, USA), anti-human CD27-BV421 (clone M-T271; Becton Dickinson, USA), anti-human IgM-PerCP Cy5.5 (clone MHM-88; BioLegend, USA); anti-human CD19-Pc7 (clone J3-119; Beckman Coulter, USA), anti-human CD27-BV711 (clone O323; BioLegend, USA), anti-human IgM-BV605 (clone MHM-88; BioLegend, USA), anti-human IgA (clone REA1014; Miltenyi, Germany), TT (AJ vaccines, Denmark) biotinylated with EZ-Link Sulfo-NHS-LC-Biotin (Thermo Fisher Scientific, UK) and fluorescently labelled with streptavidin-BV421 (BioLegend, USA) |
| Validation      | multicolor staining with positive and negative controls, see also flow cytometry section                                                                                                                                                                                                                                                                                                                                                                                                                                                                                                               |

## Human research participants

Policy information about [studies involving human research participants](#)

|                            |                                                                            |
|----------------------------|----------------------------------------------------------------------------|
| Population characteristics | healthy volunteers 18-67 years                                             |
| Recruitment                | individuals that needed to be re-vaccinated were informed about our study  |
| Ethics oversight           | The Ethics Committee of the Medical Faculty of the University of Frankfurt |

Note that full information on the approval of the study protocol must also be provided in the manuscript.

## Plots

Confirm that:

- The axis labels state the marker and fluorochrome used (e.g. CD4-FITC).
- The axis scales are clearly visible. Include numbers along axes only for bottom left plot of group (a 'group' is an analysis of identical markers).
- All plots are contour plots with outliers or pseudocolor plots.
- A numerical value for number of cells or percentage (with statistics) is provided.

## Methodology

Sample preparation

B cell profile was stained as follows: PBMC were isolated from whole blood or buffy coat by density gradient. Cells were stained with 50µl of mixture of antibodies in PBS with 0.5% FCS for 30 min, 4°C, dark. The cells were resuspend in 100ul of PBS, followed by adding 100ul of 4% PFA (paraformaldehyd) (Sigma-Aldrich Chemie GmbH, Germany) and the suspension was well mixed. The samples were kept in fridge (4°C) over night. Next day the samples were washed before the measurement and cells were resuspended in PBS with 0.5% FCS.  
For TT enumeration: PBMC were isolated from buffy coat by density gradient. Untouched B cells were enriched from PBMC using the EasySep human B cell enrichment kit (StemCell Technologies, Canada). TT-specific B cells in buffy coat PBMC were stained as described above and measured immediatly without fixing step.

Instrument

BD LSRII SORP flow cytometer (Becton Dickinson, USA); FACS Aria™ Fusion (Beckman Coulter, USA)

Software

Collection of the data: BD FACS Diva software version 8.0.1 (BD Biosciences, Heidelberg, Germany); Analysis: Kaluza Analysis Software (Beckman Coulter, USA)

Cell population abundance

B cells represent 5-10% of whole PBMC

Gating strategy

Gating strategy provided in the manuscript. Positivity or negativy based on unstained controls.

- Tick this box to confirm that a figure exemplifying the gating strategy is provided in the Supplementary Information.
